# Supplementary material for: DDR2 controls the epithelial-mesenchymal-transition-related gene expression via c-Myb acetylation upon matrix stiffening
Source: PubMed Central journal article supplement (PMC5533734; doi:10.1038/s41598-017-07126-7), 2017-07-28
Supplement: 41598_2017_7126_MOESM1_ESM.pdf [file 41598_2017_7126_MOESM1_ESM.pdf]

## DDR2 controls the epithelial-mesenchymal-transition-related gene expression via c-Myb acetylation upon matrix stiffening

Daehwan Kim<sup>†</sup>, Eunae You<sup>†</sup>, Jangho Jeong, Panseon Ko, Jung-Woong Kim and Sangmyung Rhee\*

Department of Life Science, Chung-Ang University, Seoul 06974, Republic of Korea

<sup>†</sup> These two authors contributed equally to this work.

\*To whom correspondence should be addressed:

Tel.: +82 2-820-5818

Fax: +82 2-825-5206

E-mail: [sangmyung.rhee@cau.ac.kr](mailto:sangmyung.rhee@cau.ac.kr)

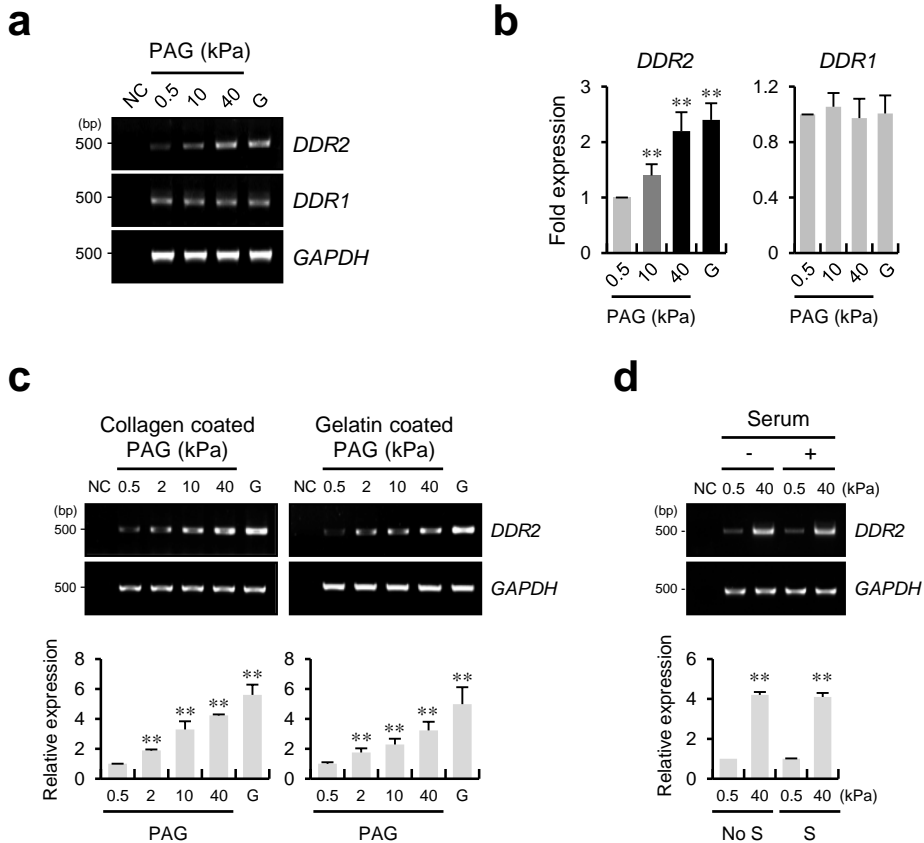

**Supplementary Figure 1.** Expression of *DDR2* transcripts is dependent on matrix rigidity. (a,b) RT-PCR (a) and qRT-PCR (b) analyses of expression levels of *DDR1*, *DDR2*, and *GAPDH* in H1299 cells incubated on a PAG of various stiffness or on glass (G). (c) RT-PCR analysis of the expression levels of *DDR2* and *GAPDH* in H1299 cells incubated on a PAG of various stiffness or glass coated with collagen or gelatine. (d) RT-PCR analysis of expression levels of *DDR2* and *GAPDH* in H1299 cells incubated on a PAG in the absence or presence of serum. Band densities were measured and normalised to *GAPDH* expression levels under the same conditions. NC, negative control. Data represent the mean of three independent experiments  $\pm$  SEM. \*\*  $P < 0.01$ .

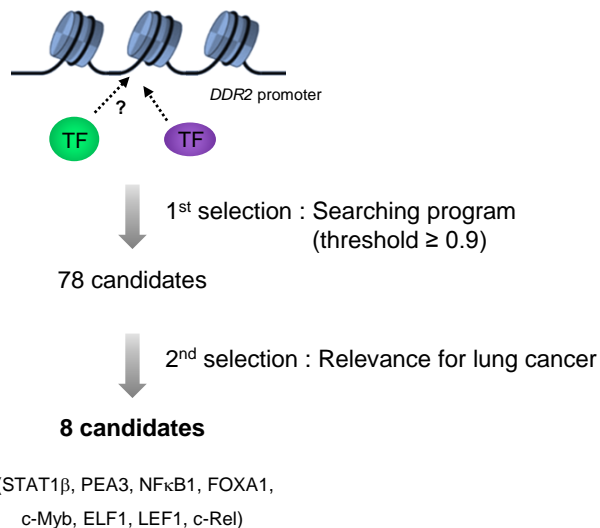

**Supplementary Figure 2.** The experimental scheme employed to analyse transcription factors that regulate *DDR2* promoter activity in lung cancer. Seventy-eight candidates are listed in Supplementary Table 1, and eight candidates (STAT1 $\beta$ , PEA3, NF $\kappa$ B1, FOXA1, c-Myb, ELF1, LEF1, and c-Rel) were eventually selected.

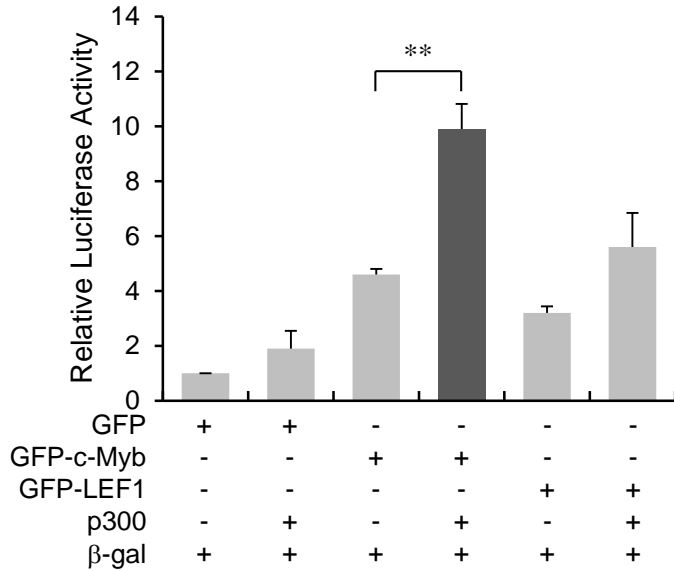

**Supplementary Figure 3.** Coexpression of c-Myb with p300 induces *DDR2* promoter activity. Relative expression of *DDR2* WT promoter-driven luciferase reporters in c-Myb-, LEF1-, or p300-overexpressing H1299 cells. Data represent the mean of three independent experiments  $\pm$  SEM. \*\* $P < 0.01$ .

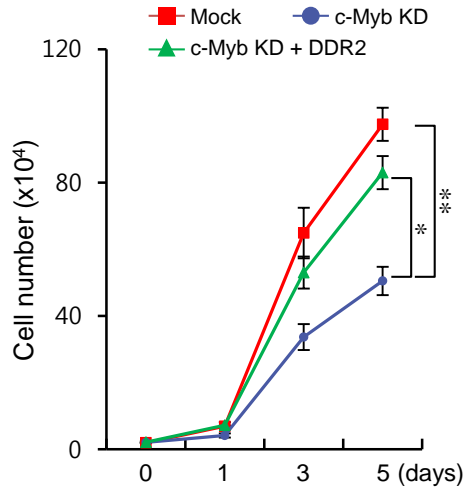

**Supplementary Figure 4.** Inhibition of proliferation in c-Myb knockdown H1299 cells is reversed by DDR2 overexpression. Quantification of proliferation of H1299 cells incubated on a stiff matrix for the indicated periods. The cells were trypsinized and counted. Data represent the mean of three independent experiments  $\pm$  SEM. \* $P < 0.05$ , \*\* $P < 0.01$ .

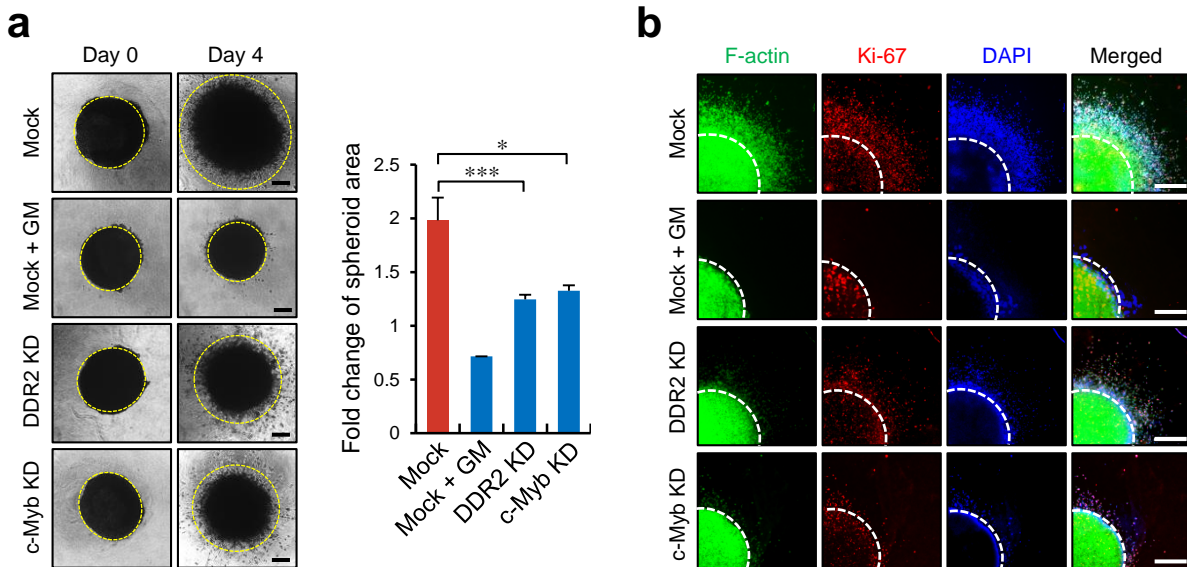

**Supplementary Figure 5.** A knockdown of c-Myb and DDR2 inhibits cancer invasion in a 3D environment. H1299 cells expressing mock (with or without 5  $\mu$ M GM6001), anti-DDR2, or anti-c-Myb shRNA were incubated for 2 days to form spheroids as described in the *Methods* section. Collagen-embedded spheroids were further incubated for 4 days, fixed, and stained with phalloidin, an anti-Ki-67 antibody, and DAPI. The spheroids were examined by phase contrast microscopy (**a**) and fluorescence microscopy (**b**). GM: GM6001. Scale bars: 200  $\mu$ m (a) and 500  $\mu$ m (b). Data represent the mean of three independent experiments  $\pm$  SEM. \* $P$  < 0.05, \*\*\* $P$  < 0.001.

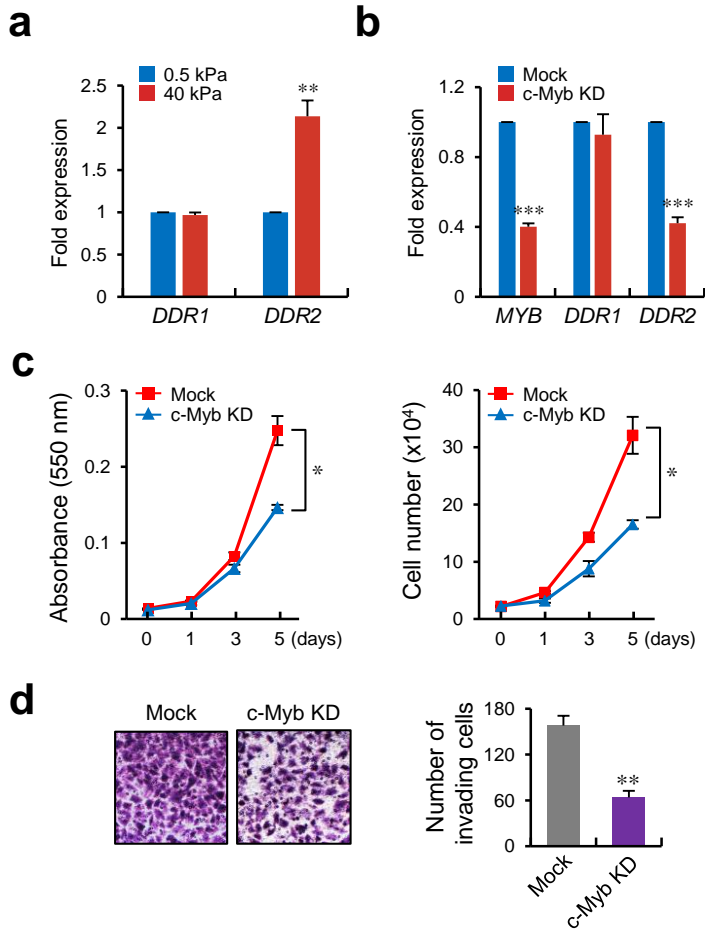

**Supplementary Figure 6.** The knockdown of c-Myb inhibits proliferation and invasiveness of A549 cells. **(a)** qRT-PCR analysis of *DDR1* and *DDR2* on 0.5- and 40-kPa PAGs in A549 cells. **(b)** qRT-PCR of *MYB*, *DDR1* and *DDR2* on 40 kPa PAGs in mock shRNA and c-Myb KD A549 cells. **(c)** Quantification of cell proliferation in mock or anti-c-Myb shRNA-expressing A549 cells. Graphs show absorbance of crystal violet (left) and the number of counted cells (right). **(d)** Quantification of invasion. Data represent the mean of three independent experiments  $\pm$  SEM. \* $P < 0.05$ , \*\* $P < 0.01$ , \*\*\* $P < 0.005$ .

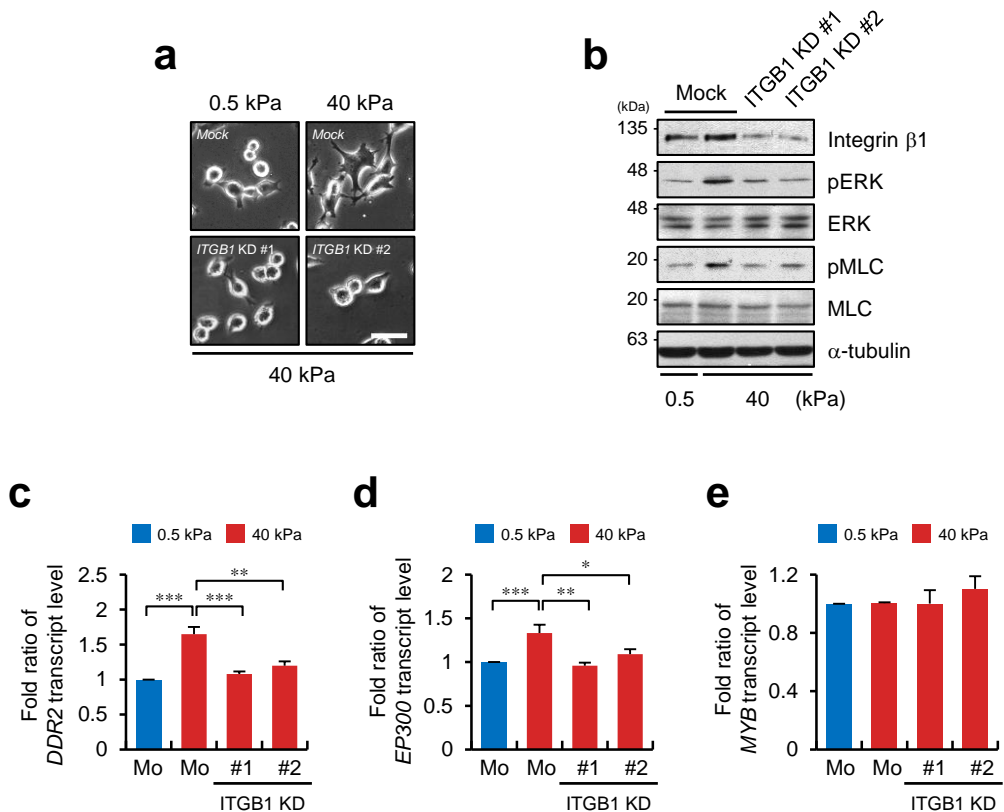

**Supplementary Figure 7.** Cellular contractility on a stiff matrix regulates the expression of *DDR2* and *EP300* via integrin  $\beta$ 1. **(a)** A phase contrast image of H1299 cells transfected with mock siRNA or anti-integrin  $\beta$ 1 siRNA (#1 and #2) on 0.5- and 40-kPa PAGs. Scale bar, 50  $\mu$ m. **(b)** Western blot analysis of mock or anti-integrin  $\beta$ 1 siRNA-transfected H1299 cells. **(c,d,e)** qRT-PCR analysis of expression of *DDR2* (c), *EP300* (d), and *MYB* (e) in mock and integrin  $\beta$ 1 knockdown cells. qRT-PCR values were normalised to *GAPDH*. Mo: Mock. Data represent the mean of three independent experiments  $\pm$  SEM. \* $P$ < 0.05, \*\* $P$ < 0.01, \*\*\* $P$ < 0.005.



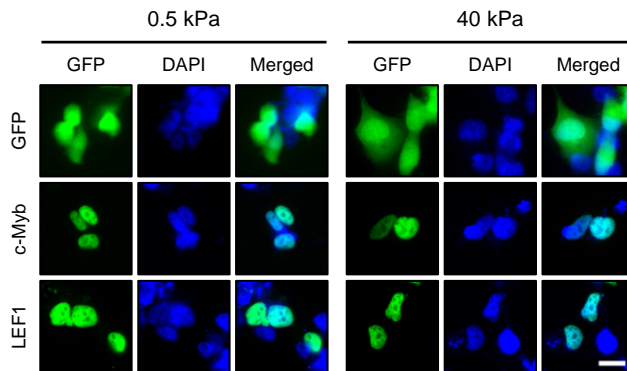

**Supplementary Figure 8.** Cellular localisation of c-Myb and LEF1 does not depend on matrix stiffness. Fluorescent images of H1299 cells transfected with plasmids encoding GFP, GFP-c-Myb, or GFP-LEF1 and incubated on a PAG. Nuclei were stained with DAPI. Scale bar, 10  $\mu$ m.

**Figure 1c**

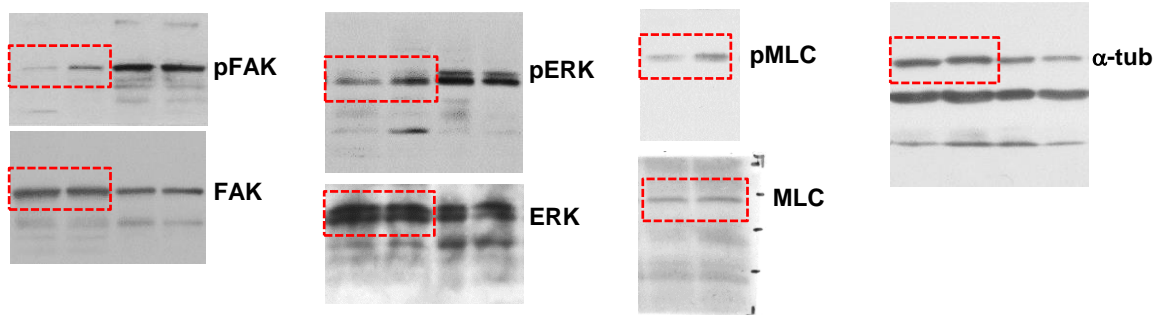

**Figure 2a**

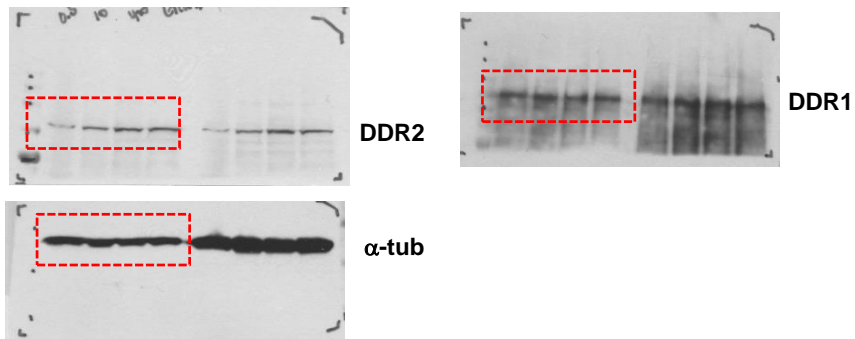

**Figure 2b**

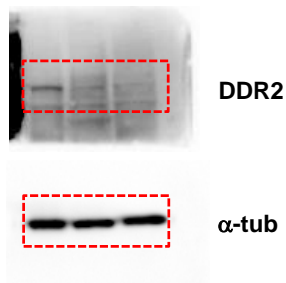

**Figure 2d**

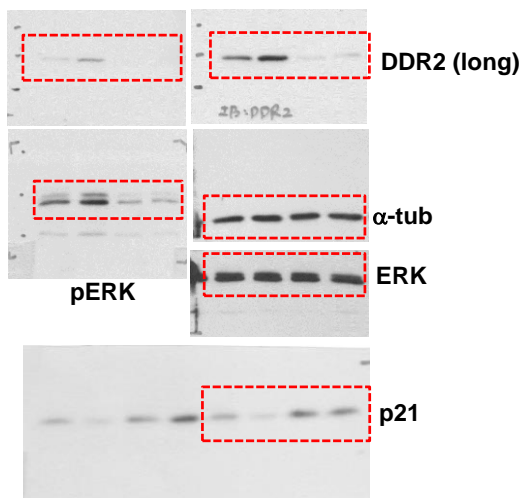

**Figure 3b**

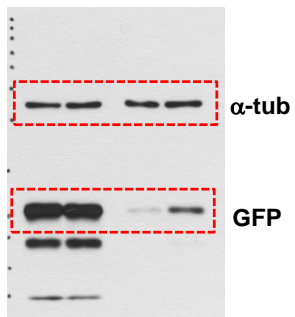

**Figure 4e and 4g**

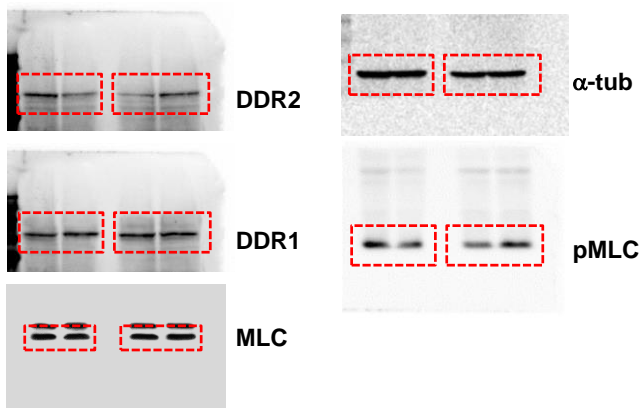

**Figure 5d**

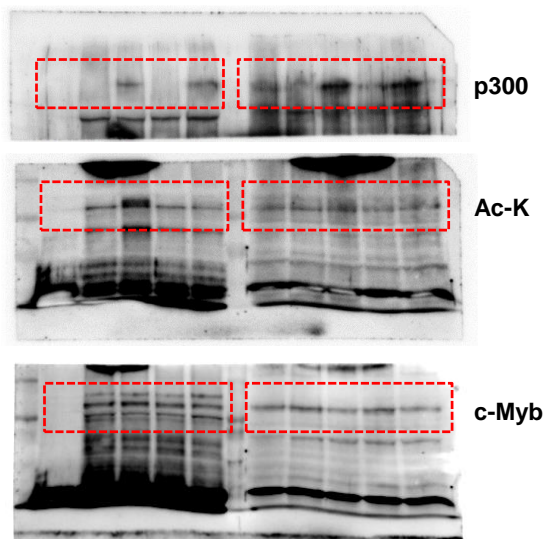

**Figure 5f**

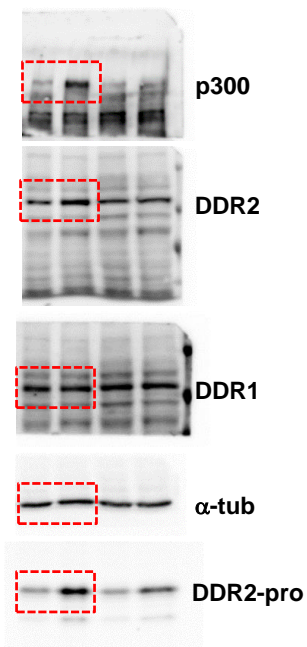

**Figure 5a**

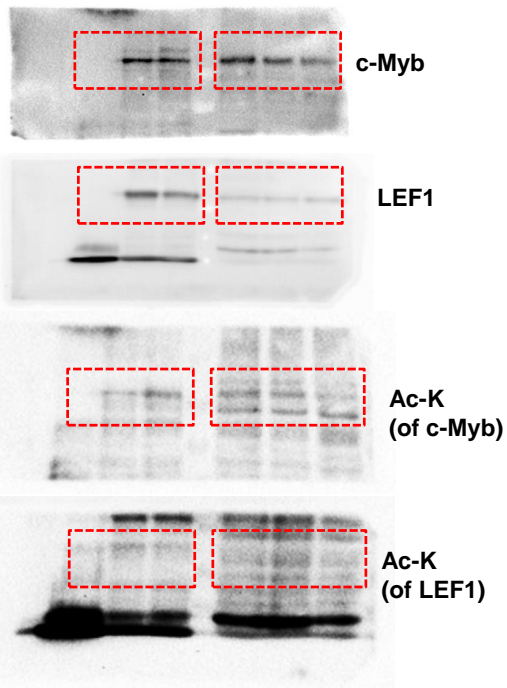

**Figure 6c**

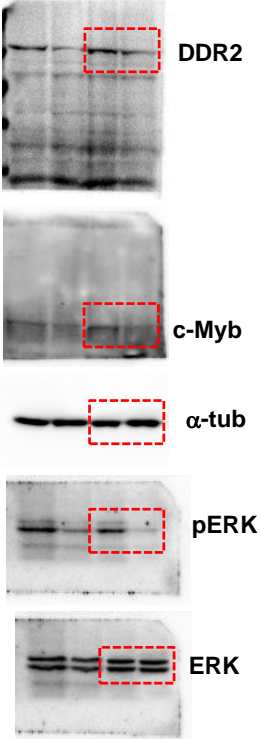

**Figure 6e**

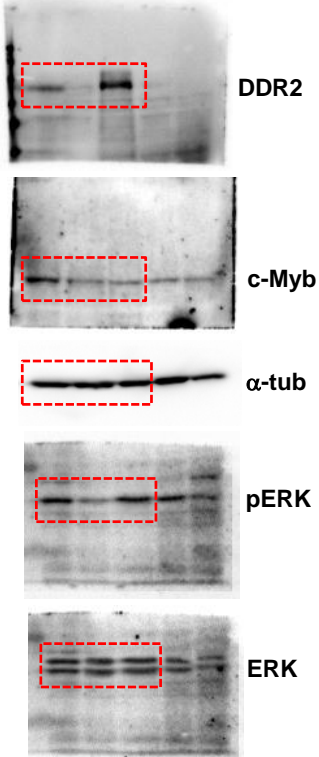

**Supplementary Figure 9.** Full length blots. Red dotted lines show the cropping locations.

**Supplementary Table 1.** Seventy-eight transcription factors that are predicted to bind to the *DDR2* promoter region.

| No | Name            | Description                                                               |
|----|-----------------|---------------------------------------------------------------------------|
| 1  | FOXP3           | Forkhead box P3                                                           |
| 2  | RXR $\alpha$    | Retinoid X receptor alpha                                                 |
| 3  | NR3C1           | Nuclear receptor subfamily 3, group C, member 1 (glucocorticoid receptor) |
| 4  | RAR $\beta$     | Retinoic acid receptor beta                                               |
| 5  | GR $\alpha$     | Glucocorticoid receptor alpha                                             |
| 6  | C/EBP $\alpha$  | CCAAT/enhancer binding protein alpha                                      |
| 7  | C/EBP $\beta$   | CCAAT/enhancer binding protein beta                                       |
| 8  | POU2F2          | POU class 2 homeobox 2                                                    |
| 9  | c-Myb           | Transcription factor c-Myb                                                |
| 10 | FOXA1           | Forkhead box A1                                                           |
| 11 | FOXA2           | Forkhead box A2                                                           |
| 12 | XBP-1           | X-box binding protein 1                                                   |
| 13 | TFIID           | Transcription factor II D                                                 |
| 14 | c-Ets-1         | V-ets erythroblastosis virus E26 oncogene homolog 1                       |
| 15 | c-Ets-2         | V-ets erythroblastosis virus E26 oncogene homolog 2                       |
| 16 | IRF-1           | Interferon regulatory factor 1                                            |
| 17 | NFATC1          | Nuclear factor of activated T-cells, cytoplasmic, calcineurin-dependent 1 |
| 18 | NFATC2          | Nuclear factor of activated T-cells, cytoplasmic, calcineurin-dependent 2 |
| 19 | AP-2 $\alpha$ A | Transcription factor AP-2-alpha A                                         |
| 20 | p53             | Tumor protein p53                                                         |
| 21 | AR              | Androgen receptor                                                         |
| 22 | GATA-1          | GATA binding protein 1 (globin transcription factor 1)                    |
| 23 | GATA-2          | GATA binding protein 2 (globin transcription factor 2)                    |
| 24 | STAT1 $\beta$   | Signal transducer and activator of transcription 1beta                    |
| 25 | STAT4           | Signal transducer and activator of transcription 4                        |
| 26 | STAT5A          | Signal transducer and activator of transcription 5a                       |
| 27 | ATF3            | Activating transcription factor 3                                         |
| 28 | NFI/CTF         | Nuclear factor I-CCAAT-binding transcription factor                       |
| 29 | NF-1            | Neurofibromin 1                                                           |
| 30 | SRY             | Sex-determining region Y                                                  |
| 31 | TCF-4E          | Transcription factor 7 like 2, T cell specific, HMG box                   |
| 32 | VDR             | Vitamin D (1,25- dihydroxyvitamin D3) receptor                            |

|    |          |                                                                                                                      |
|----|----------|----------------------------------------------------------------------------------------------------------------------|
| 33 | PXR-1    | Pregnane X receptor                                                                                                  |
| 34 | c-Jun    | Jun proto-oncogene                                                                                                   |
| 35 | c-Fos    | FBJ murine osteosarcoma viral oncogene homolog                                                                       |
| 36 | HNF-1A   | HNF1 homeobox A                                                                                                      |
| 37 | HNF-1B   | HNF1 homeobox B                                                                                                      |
| 38 | YY1      | YY1 transcription factor                                                                                             |
| 39 | POU2F1   | POU class 2 homeobox 1                                                                                               |
| 40 | TEAD2    | TEA domain family member 2                                                                                           |
| 41 | RBP-Jκ   | Recombination signal binding protein for immunoglobulin kappa J region                                               |
| 42 | PEA3     | Phosphatidylinositol-4-phosphate 5-kinase and related FYVE finger-containing proteins signal transduction mechanisms |
| 43 | COUP-TF1 | Nuclear receptor subfamily 2, group F, member 1                                                                      |
| 44 | LEF-1    | Lymphoid enhancer-binding factor 1                                                                                   |
| 45 | NF-κB1   | Nuclear factor of kappa light polypeptide gene enhancer in B-cells                                                   |
| 46 | E2F-1    | E2F transcription factor 1                                                                                           |
| 47 | SP1      | Sp1 transcription factor                                                                                             |
| 48 | MAZ      | MYC-associated zinc finger protein (purine-binding transcription factor)                                             |
| 49 | TBP      | TATA box binding protein                                                                                             |
| 50 | MEF-2A   | Myocyte enhancer factor 2A                                                                                           |
| 51 | HOXD9    | Homeobox D9                                                                                                          |
| 52 | HOXD10   | Homeobox D910                                                                                                        |
| 53 | NF-Y     | Nfy Histone-like transcription factor NFY protein family (IC)                                                        |
| 54 | Elk-1    | Member of ETS oncogene family                                                                                        |
| 55 | EBF      | Transcription factor COE1-like                                                                                       |
| 56 | Ik-1     | IKAROS family zinc finger 1 (Ikaros)                                                                                 |
| 57 | ELF-1    | E74-like factor 1 (ets domain transcription factor)                                                                  |
| 58 | PU.1     | SPI1 (PU 1) spleen focus forming virus (SFFV) proviral integration oncogene                                          |
| 59 | WT1      | Wilms tumor 1                                                                                                        |
| 60 | Egr-3    | Early growth response 3                                                                                              |
| 61 | AhR:Arnt | Aryl hydrocarbon receptor nuclear translocator                                                                       |
| 62 | PPARα    | Peroxisome proliferator-activated receptor alpha                                                                     |
| 63 | TCF-4    | Transcription factor 4                                                                                               |
| 64 | IRF-2    | Interferon regulatory factor 2                                                                                       |
| 65 | USF2     | Upstream transcription factor 2, c-fos interacting                                                                   |
| 66 | Pax2     | Paired box 2                                                                                                         |

|    |         |                                                          |
|----|---------|----------------------------------------------------------|
| 67 | Nkx-2.1 | Homeobox protein Nkx-2.1                                 |
| 68 | Sox-5   | sex determining region Y-box 5                           |
| 69 | HSF1    | Heat shock transcription factor 1                        |
| 70 | HSF2    | Heat shock transcription factor 2                        |
| 71 | CP2     | Transcription factor CP2                                 |
| 72 | NF-E2   | Nuclear factor, erythroid 2                              |
| 73 | MZF1    | Myeloid zinc finger 1                                    |
| 74 | Evi-1   | Ecotropic viral integration site 1                       |
| 75 | c-Rel   | V-rel avian reticuloendotheliosis viral oncogene homolog |
| 76 | NRF-2   | Nf-E2 related factor 2                                   |
| 77 | Lyf-1   | Lymphoid transcription factor LyF-1                      |
| 78 | Pbx-1   | Pre-B-cell leukemia homeobox 1                           |

---
